# Supplementary material
Source: PubMed Central journal article supplement (PMC3250176)
Supplement: 1112029108_pnas.201112029SI.pdf [file 1112029108_pnas.201112029SI.pdf]

# Supporting Information

Brewer et al. 10.1073/pnas.1112029108

**Fig. S1.** (A) Full results of general linear modeling (GLM) contrasts: relative brain activation in meditators > controls, collapsed across all meditations. (B–D) Full results of GLM contrasts: relative brain activation in meditators > controls, during Concentration meditation (B), Loving-Kindness meditation (C), and Choiceless Awareness meditation (D). (E and F) Full results of functional connectivity contrasts: regions more strongly connected with the posterior cingulate cortex seed during baseline for meditators > controls (E) and during meditation for meditators > controls (F). (G and H) Full results of functional connectivity contrasts: regions more strongly connected with the medial prefrontal cortex seed during baseline for meditators > controls (G) and during meditation for meditators > controls (H). Images are shown from  $z = -40$  to  $+65$  in steps of 3. The left side of the brain is on the left. All results are whole brain FWE-corrected at  $P < 0.05$ .

[Fig. S1](#)

**Table S1. Neural activation in meditators > controls during meditation relative to baseline**

| Brain area                                     | BA       | L/R | x   | y   | z   | k   | Maximum |
|------------------------------------------------|----------|-----|-----|-----|-----|-----|---------|
| All meditations ( $P < 0.01$ , $k = 43$ )      |          |     |     |     |     |     |         |
| Posterior cingulate/precuneus                  | 31       | L/R | 15  | -63 | 24  | 200 | -4.60   |
| Superior/medial temporal gyrus/uncus           | 38       | R   | 21  | 9   | -33 | 69  | -3.73   |
| Superior temporal gyrus                        | 39       | R   | 57  | -57 | 21  | 46  | -3.66   |
| Medial frontal gyrus*                          | 10       | L   | -6  | 57  | 3   | 33  | -3.30   |
| Choiceless Awareness ( $P < 0.01$ , $k = 43$ ) |          |     |     |     |     |     |         |
| Uncus/superior/medial temporal gyrus           | 36/38    | L   | -27 | -6  | -36 | 49  | -3.48   |
| Loving-Kindness ( $P < 0.01$ , $k = 43$ )      |          |     |     |     |     |     |         |
| Inferior temporal/parahippocampal/uncus        | 20/36/28 | R   | 33  | -6  | -39 | 78  | -4.58   |
| Posterior cingulate/precuneus                  | 7/30/31  | L/R | -12 | -66 | 33  | 301 | -4.35   |
| Inferior parietal lobule                       | 40       | R   | 54  | -36 | 45  | 125 | -3.83   |
| Inferior temporal/parahippocampal/amygdala     | 28/20    | L   | -27 | -12 | -30 | 180 | -3.50   |
| Concentration ( $P < 0.01$ , $k = 43$ )        |          |     |     |     |     |     |         |
| Posterior cingulate/precuneus                  | 23       | L/R | -6  | -60 | 18  | 167 | -4.97   |
| Middle temporal/angular gyrus                  | 39       | L   | -48 | -72 | 30  | 43  | -3.54   |

Neural activation in meditators > controls during meditation relative to baseline. Coordinates are in Montreal Neurological Institute (MNI) space; BA, Brodmann area;  $k$ , cluster size; L/R, left vs. right hemisphere; Maximum,  $t$  value at peak voxel. Results are  $P < 0.05$  FWE-corrected (height + extent).

\*Indicates regions of a priori interest, reported at uncorrected threshold of  $P < 0.01$  (one-tailed).

**Table S2. Functional connectivity with posterior cingulate cortex seed region**

| Brain area                                 | BA       | L/R | x   | y   | z   | k   | Maximum |
|--------------------------------------------|----------|-----|-----|-----|-----|-----|---------|
| Baseline ( $P < 0.01$ , $k = 43$ )         |          |     |     |     |     |     |         |
| Meditators > controls                      |          |     |     |     |     |     |         |
| Middle occipital gyrus                     | 19       | L   | -45 | -87 | 21  | 221 | 6.71    |
| Middle/superior occipital gyrus            | 19       | R   | 39  | -84 | 21  | 174 | 6.38    |
| Rostral superior frontal gyrus             | 11       | L   | -27 | 60  | -12 | 126 | 5.40    |
| Dorsal anterior cingulate gyrus            | 24       |     | 0   | 6   | 30  | 92  | 4.90    |
| Inferior temporal/fusiform gyrus           | 37       | L   | -51 | -60 | -15 | 116 | 4.43    |
| Middle/inferior frontal gyrus              | 46       | L   | -48 | 36  | 15  | 104 | 4.33    |
| Postcentral gyrus/inferior parietal lobule | 2/40     | R   | 72  | -21 | 27  | 154 | 4.32    |
| Inferior/middle frontal gyrus              | 46       | R   | 42  | 21  | 24  | 118 | 4.11    |
| Precuneus/cuneus                           | 19/7     | L   | 30  | -66 | 39  | 64  | 4.07    |
| Middle/superior temporal gyrus             | 21/22    | R   | 60  | -39 | -3  | 108 | 4.03    |
| Superior temporal/postcentral gyrus/insula | 41/40/13 | L   | -51 | -18 | 9   | 116 | 3.93    |
| Lingual gyrus                              | 74       | R   | 27  | -60 | -3  | 154 | 3.84    |
| Precuneus                                  | 7        | L   | -24 | -66 | 27  | 193 | 3.76    |
| Posterior cingulate                        |          | L   | -18 | -66 | 6   | 63  | 3.68    |
| Controls > meditators                      |          |     |     |     |     |     |         |
| Dorsal caudate                             |          | R   | 12  | -24 | 27  | 234 | -4.06   |
| All meditations ( $P < 0.01$ , $k = 43$ )  |          |     |     |     |     |     |         |
| Meditators > controls                      |          |     |     |     |     |     |         |
| Posterior cingulate/precuneus              | 30/31    | R   | 18  | -60 | 24  | 169 | 4.98    |
| Middle temporal gyrus                      | 21       | R   | 69  | -39 | -12 | 130 | 4.39    |
| Cingulate gyrus                            | 24       |     | 0   | 6   | 27  | 62  | 4.37    |
| Inferior parietal/superior temporal        | 40       | R   | 66  | -30 | 42  | 95  | 3.98    |
| Inferior parietal lobule/insula            | 40/13    | L   | -48 | -36 | 24  | 61  | 3.51    |
| Cuneus/precuneus                           | 30/7     | L   | -15 | -66 | 12  | 98  | 3.50    |
| Middle/inferior frontal gyrus*             | 46       | L   | -45 | 27  | 18  | 42  | 3.12    |
| Controls > meditators                      |          |     |     |     |     |     |         |
| Caudate                                    |          | R   | 21  | -30 | 27  | 70  | -4.02   |

Functional connectivity with posterior cingulate cortex seed region. Coordinates are in MNI space; BA, Brodmann area;  $k$ , cluster size; L/R, left vs. right hemisphere; Maximum,  $t$  value at peak voxel. Results are  $P < 0.05$  FWE-corrected (height + extent).

\*Indicates regions of a priori interest, reported at uncorrected threshold of  $P < 0.01$  (one-tailed).

**Table S3. Functional connectivity with medial prefrontal cortex seed region**

| Brain area                                | BA       | L/R | x   | y   | z   | k   | Maximum |
|-------------------------------------------|----------|-----|-----|-----|-----|-----|---------|
| Baseline ( $P < 0.01$ , $k = 43$ )        |          |     |     |     |     |     |         |
| Meditators > controls                     |          |     |     |     |     |     |         |
| Fusiform/inferior temporal gyrus          | 37/20    | L   | -48 | -54 | -21 | 125 | 5.86    |
| Uncus/inferior temporal gyrus             | 20       | L   | -24 | -3  | -36 | 132 | 4.39    |
| Inferior parietal lobule                  | 1        | R   | 63  | -24 | 42  | 58  | 4.20    |
| Cerebellum/inferior occipital             |          | R   | 27  | -69 | -24 | 87  | 3.92    |
| All meditations ( $P < 0.01$ , $k = 43$ ) |          |     |     |     |     |     |         |
| Meditators > controls                     |          |     |     |     |     |     |         |
| Superior temporal gyrus                   | 41       | R   | 42  | -42 | 12  | 159 | 8.05    |
| Uncus/inferior/middle temporal            | 20       | L   | -27 | -6  | -36 | 495 | 6.39    |
| Fusiform/middle (posterior) temporal      | 37       | L   | -54 | -54 | -15 | 499 | 5.44    |
| Middle/inferior temporal/uncus            | 21/20/36 | R   | 39  | -6  | -33 | 232 | 5.08    |
| Cerebellum                                | 38       | R   | 18  | -69 | -24 | 259 | 4.78    |
| Inferior temporal gyrus                   | 37       | R   | 45  | -42 | -12 | 51  | 4.62    |
| Posterior insula                          | 40       | R   | 48  | -30 | 24  | 53  | 3.53    |
| Insula/superior/transverse temporal       | 13/22/41 | L   | -39 | -6  | -9  | 84  | 3.49    |
| Fusiform/lingual gyrus                    | 37       | R   | 30  | -48 | -15 | 102 | 3.34    |
| Controls > meditators                     |          |     |     |     |     |     |         |
| Middle frontal gyrus                      | 9        | R   | 24  | 24  | 24  | 90  | -3.82   |

Functional connectivity with medial prefrontal cortex seed region. Coordinates are in MNI space; BA, Brodmann area;  $k$ , cluster size; L/R, left vs. right hemisphere; Maximum =  $z$  value at peak voxel. All results are  $P < 0.05$  FWE-corrected.

**Table S4. Demographics**

| Demographics             | Meditators<br>( <i>n</i> = 12) <i>n</i> (%) | Controls<br>( <i>n</i> = 12) <i>n</i> (%) | Total<br>( <i>n</i> = 24) <i>n</i> (%) | <i>F</i> or $\chi^2$ | df    | <i>P</i> |
|--------------------------|---------------------------------------------|-------------------------------------------|----------------------------------------|----------------------|-------|----------|
| <b>Sex</b>               |                                             |                                           |                                        |                      |       |          |
| Male                     | 5 (41.7)                                    | 6 (50)                                    | 11 (45.8)                              | 0.168                | 1     | 0.682    |
| Female                   | 7 (58.3)                                    | 6 (50)                                    | 13 (54.2)                              |                      |       |          |
| <b>Race</b>              |                                             |                                           |                                        |                      |       |          |
| White                    | 12 (100)                                    | 12 (100)                                  | 24 (100)                               | 0.608                | 1, 22 | 0.444    |
| Age                      | 51.5 ± 6.8                                  | 49.4 ± 6.2                                | 50.5 ± 6.5                             |                      |       |          |
| <b>Education level</b>   |                                             |                                           |                                        |                      |       |          |
| College or more          | 10 (83.3)                                   | 8 (66.7)                                  | 18 (75)                                | 1.422                | 2     | 0.491    |
| Partial college          | 2 (16.7)                                    | 3 (25)                                    | 5 (20.8)                               |                      |       |          |
| High school              | 0                                           | 1 (8.3)                                   | 1 (4.2)                                |                      |       |          |
| <b>Employment status</b> |                                             |                                           |                                        |                      |       |          |
| Full time                | 9 (75)                                      | 8 (66.7)                                  | 17 (70.8)                              | 0.202                | 1     | 0.653    |
| Less than full time      | 3 (25)                                      | 4 (33.3)                                  | 7 (29.2)                               |                      |       |          |
