# Supplementary material
Source: PubMed Central journal article supplement (PMC3250176)

a)

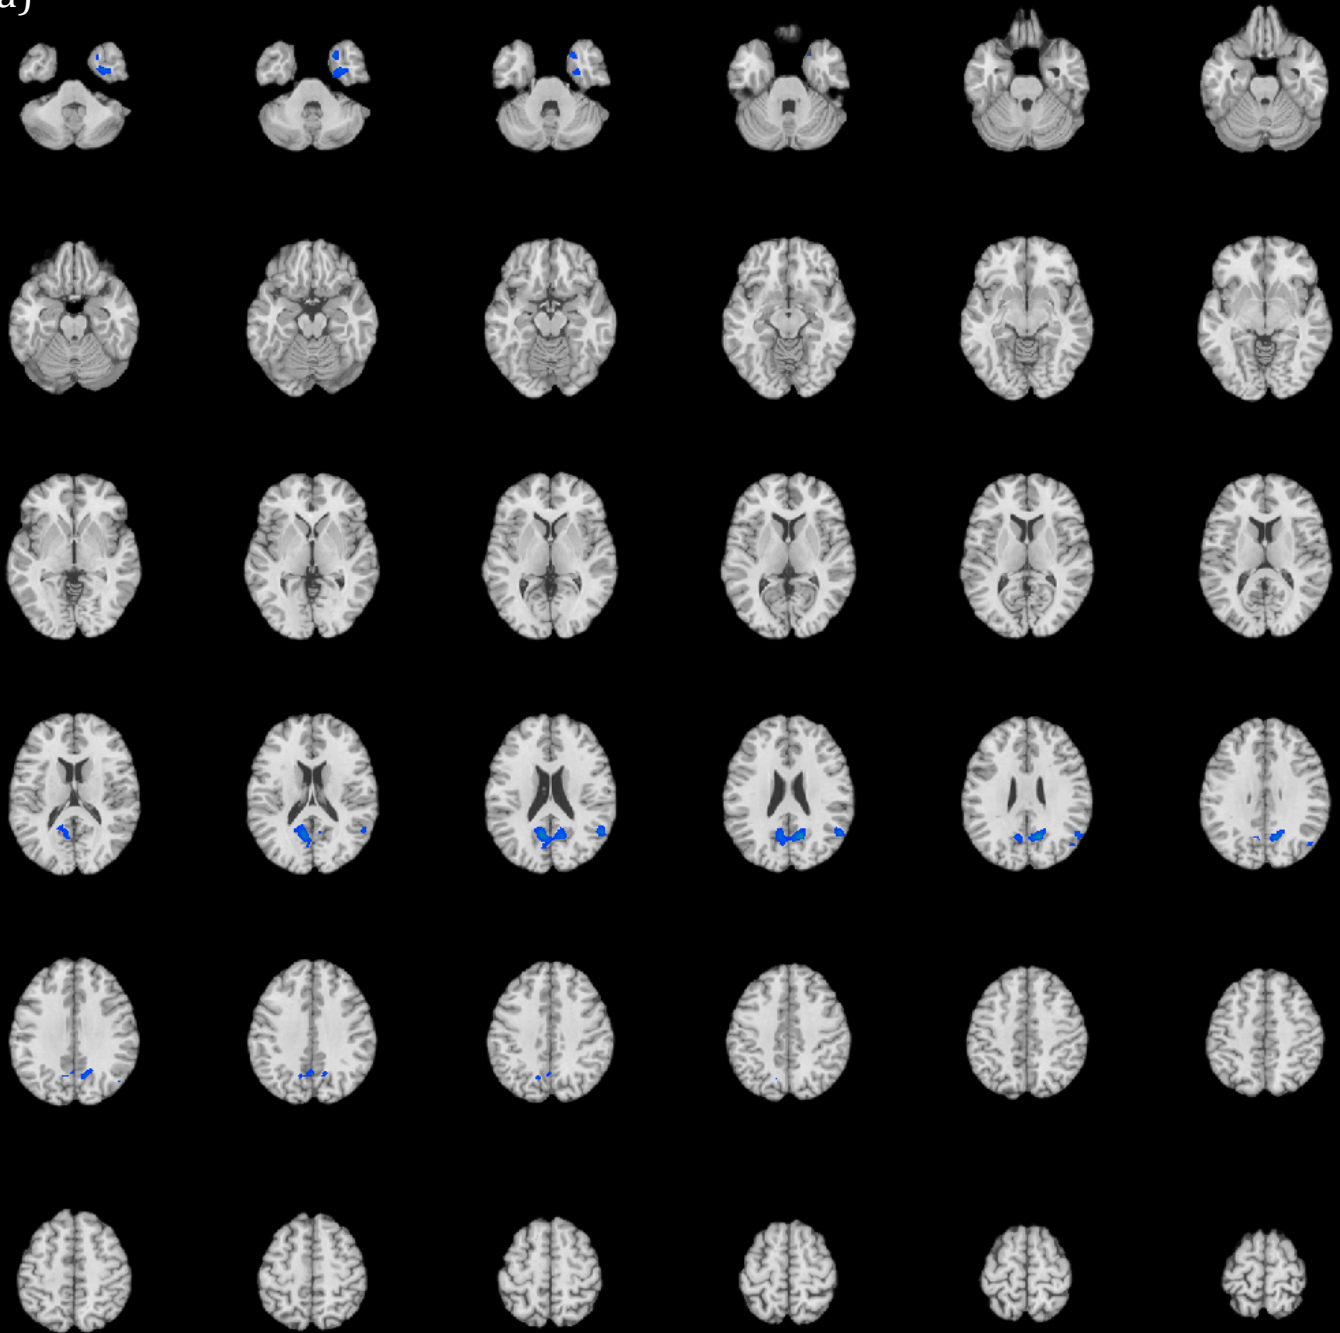

b)

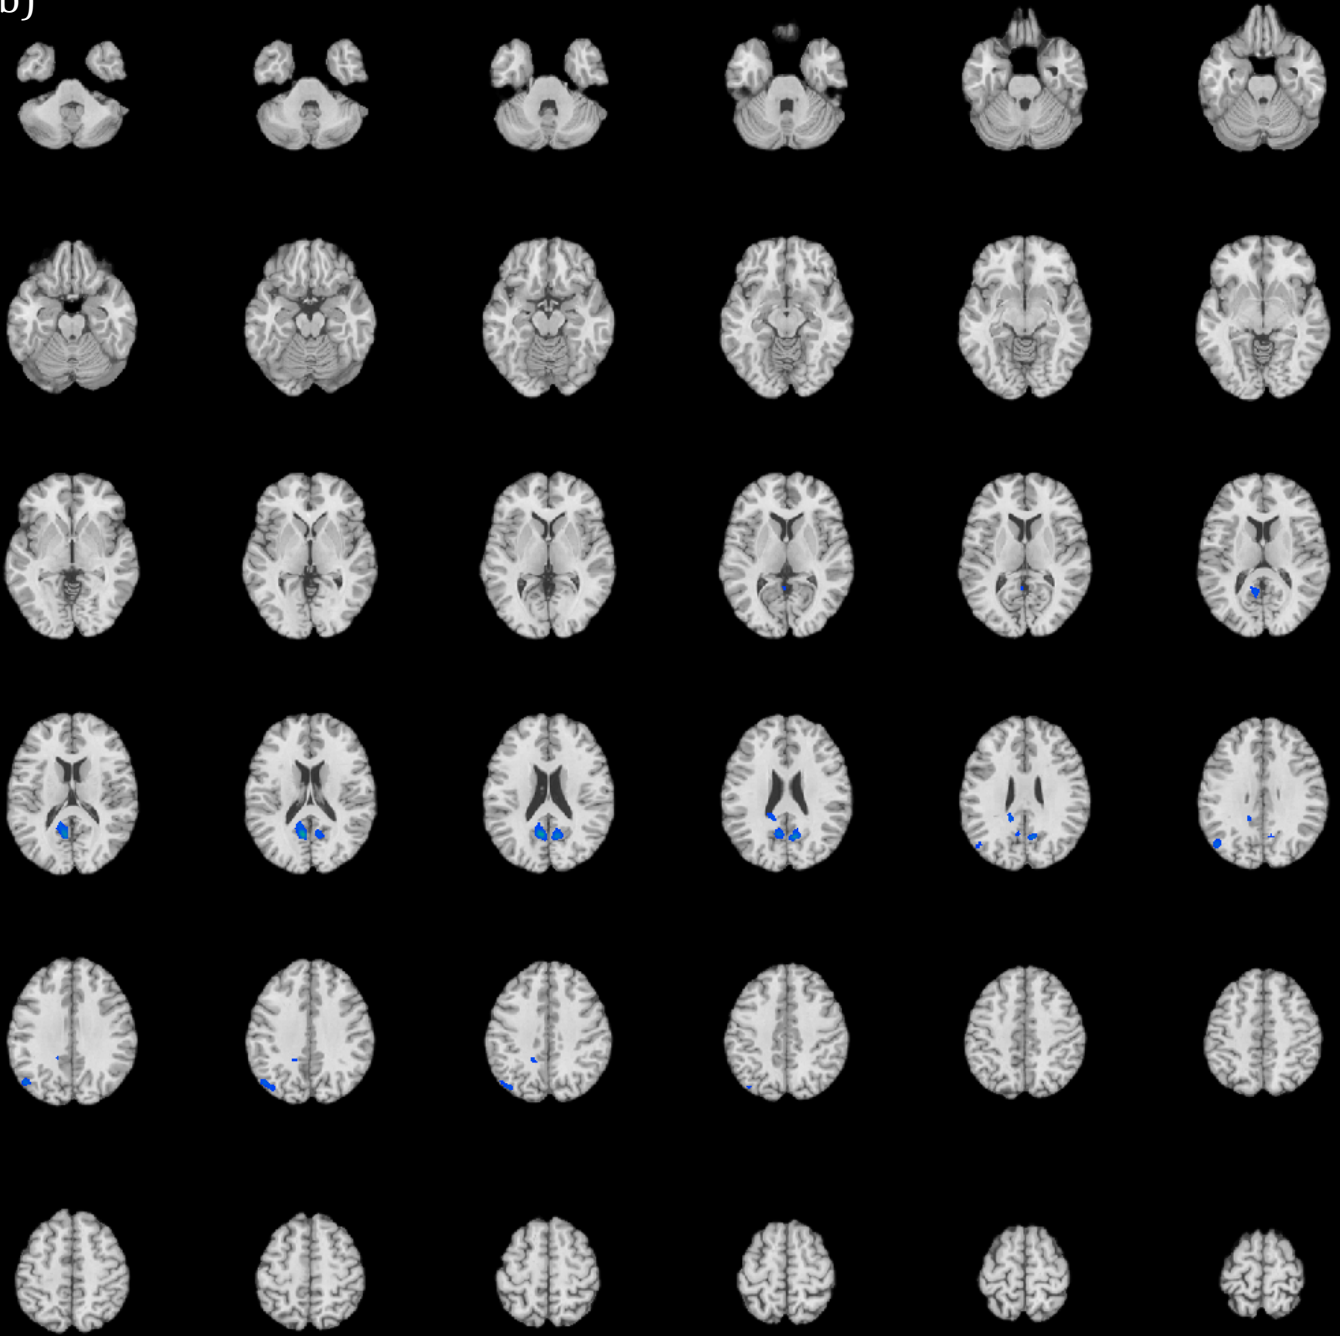

c)

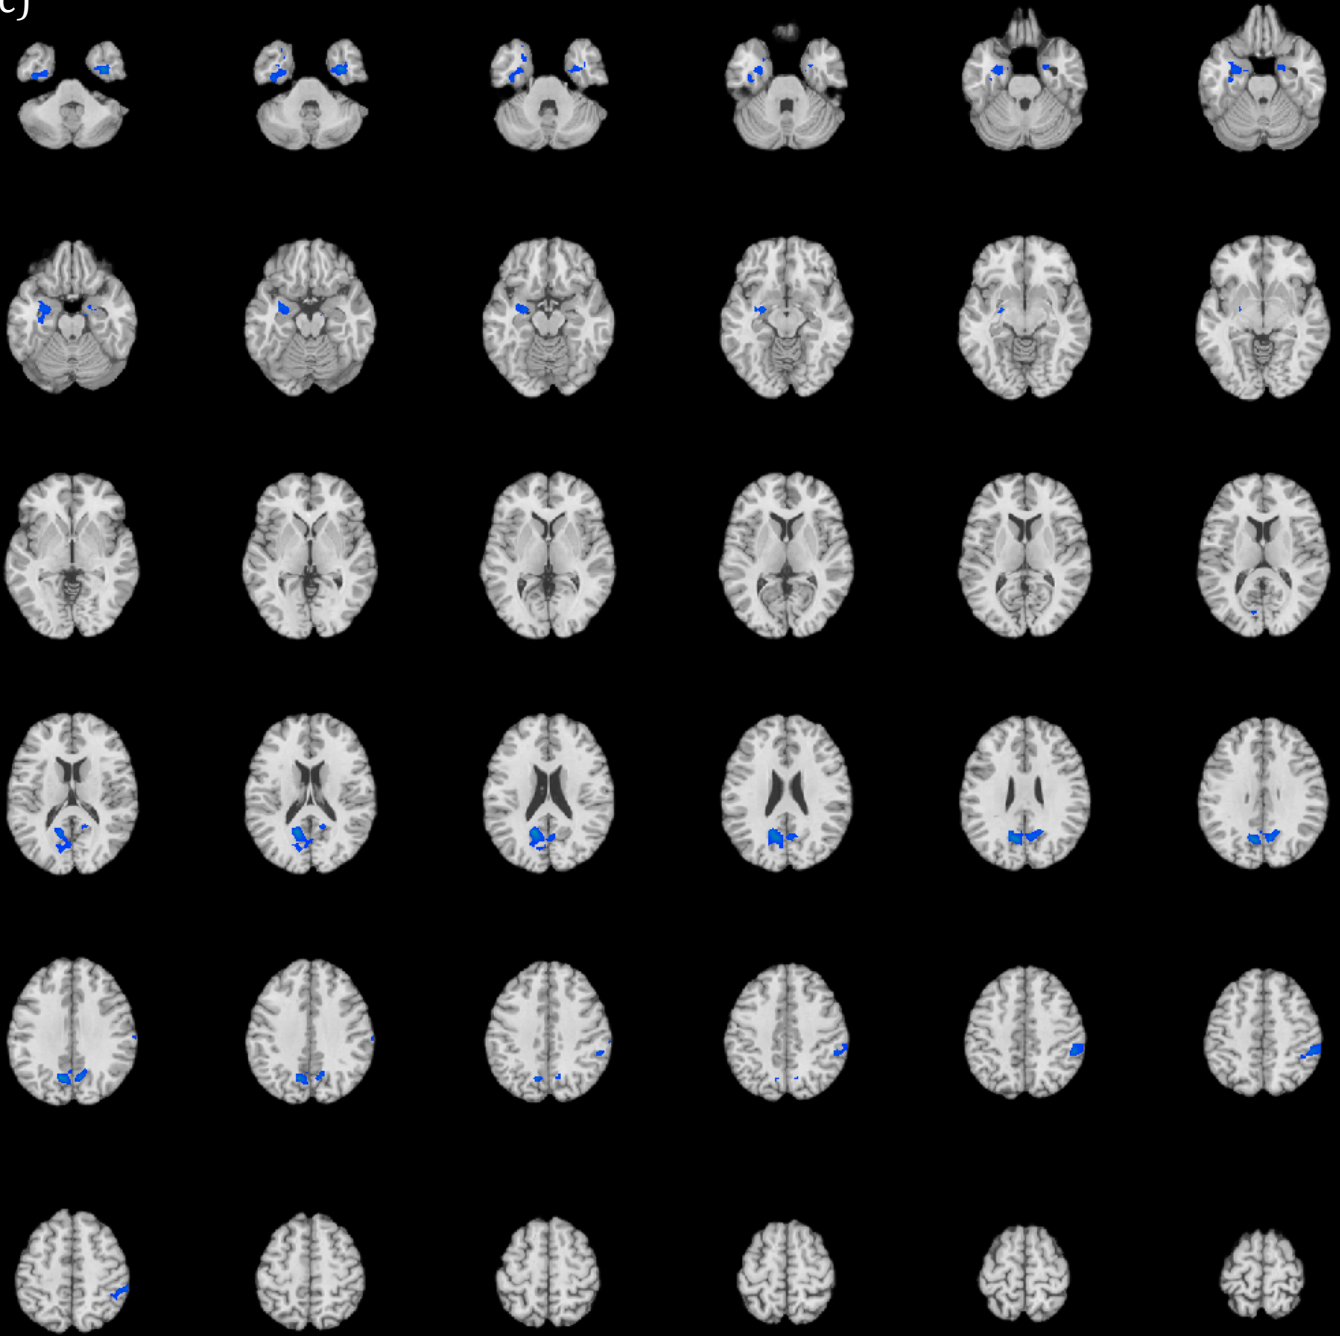

d)

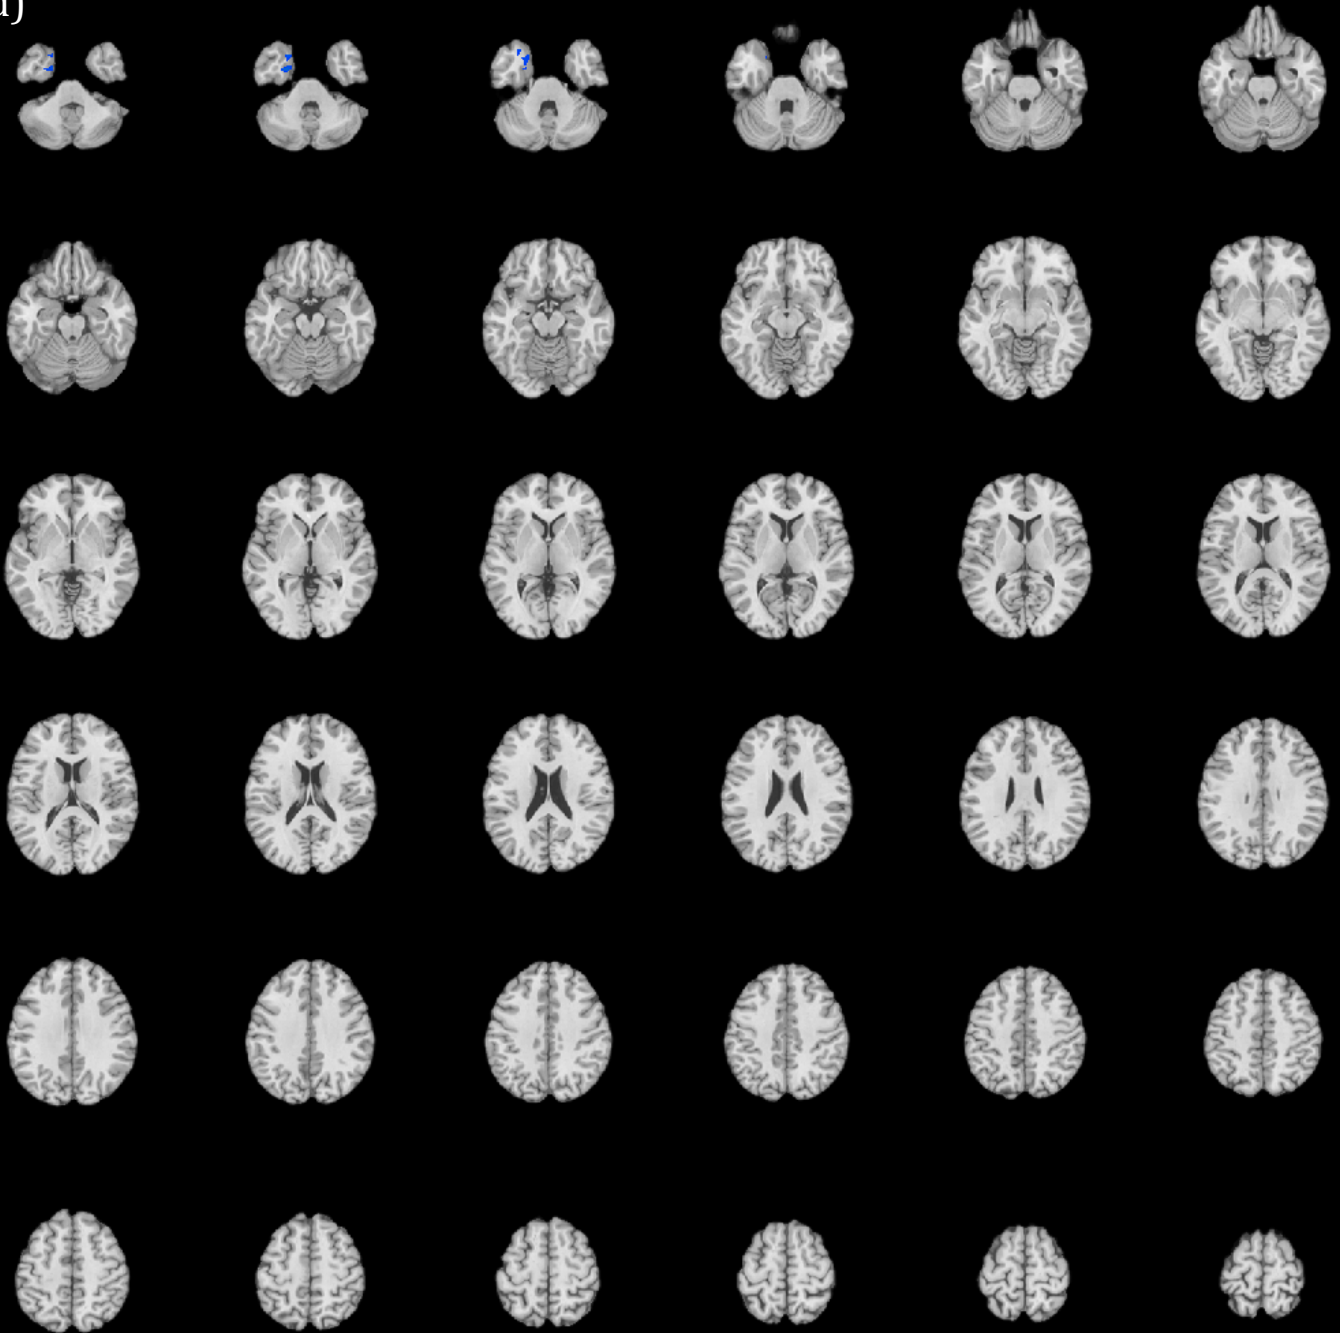

e)

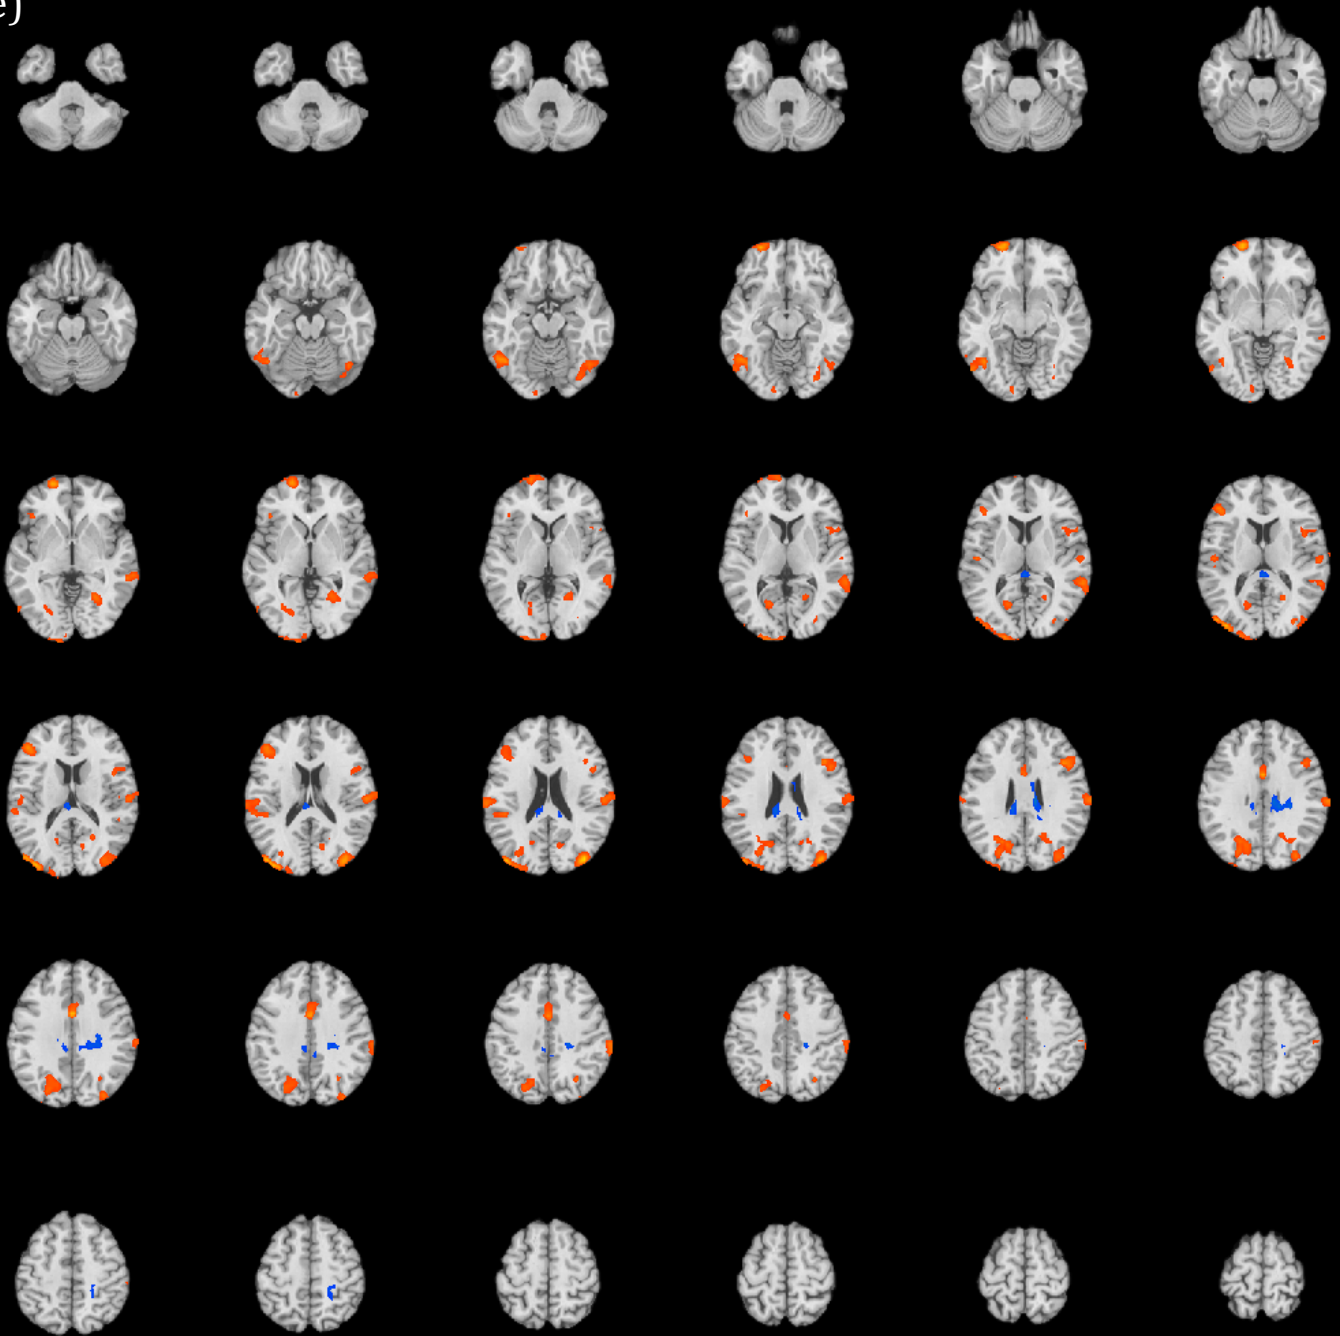

f)

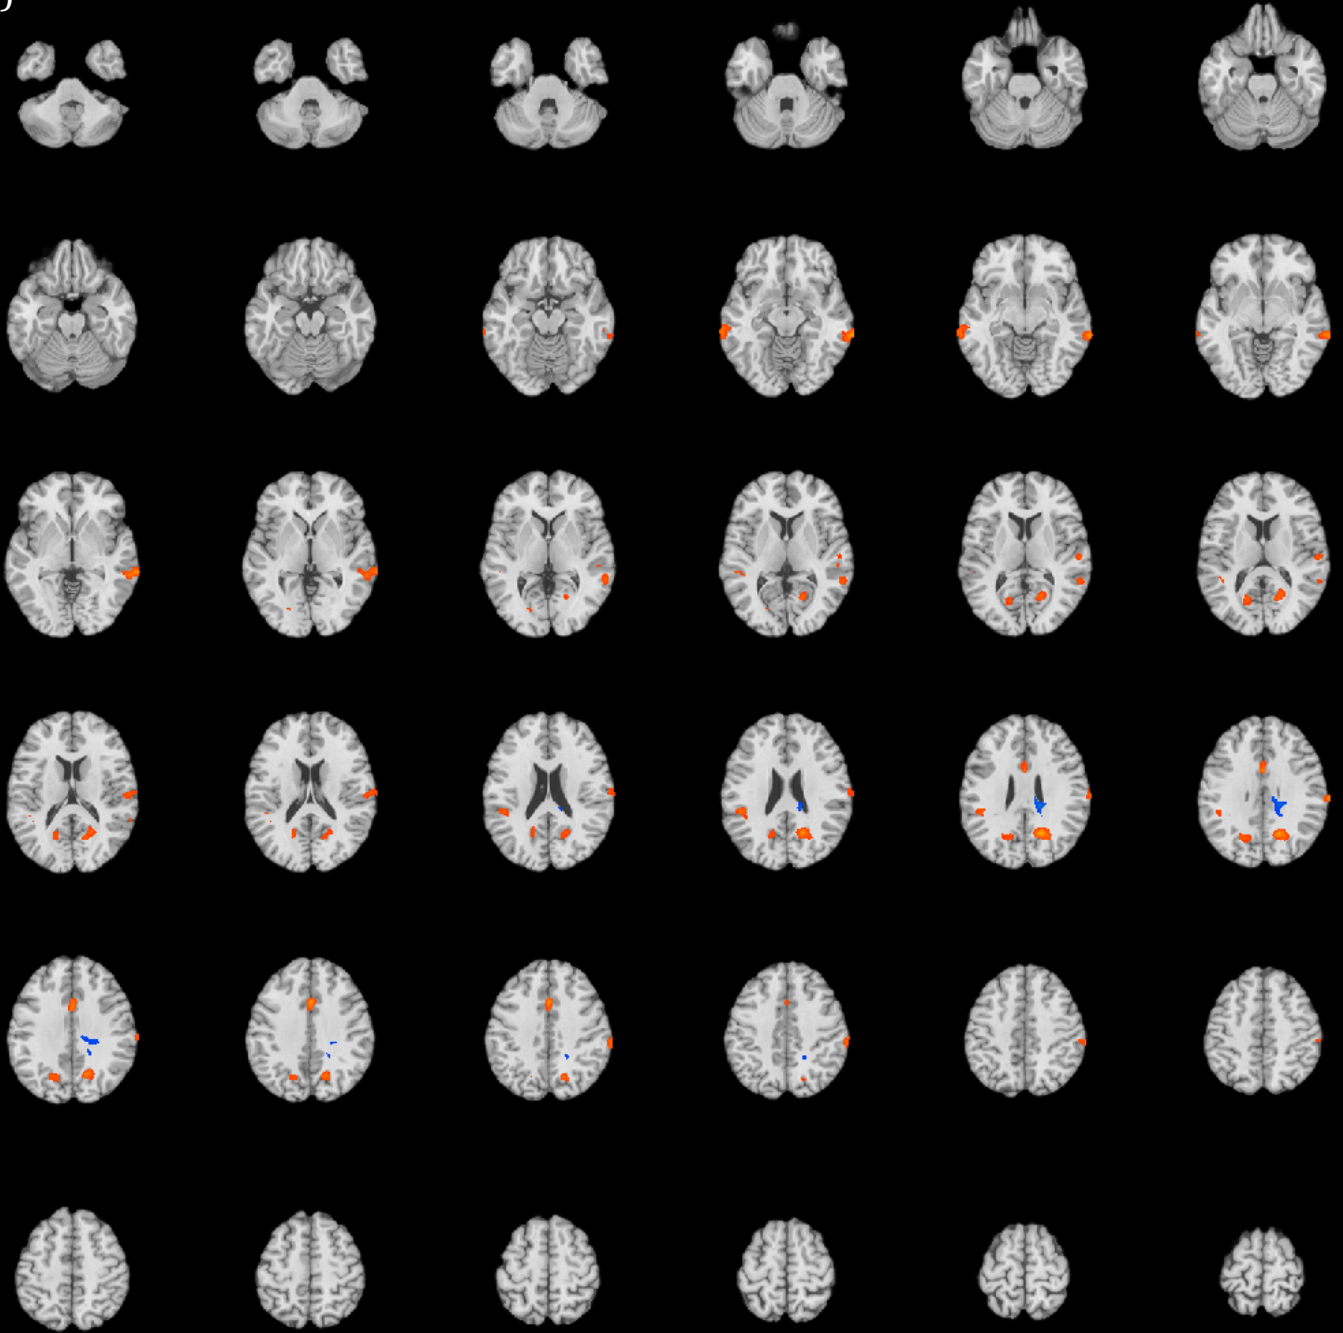

g)

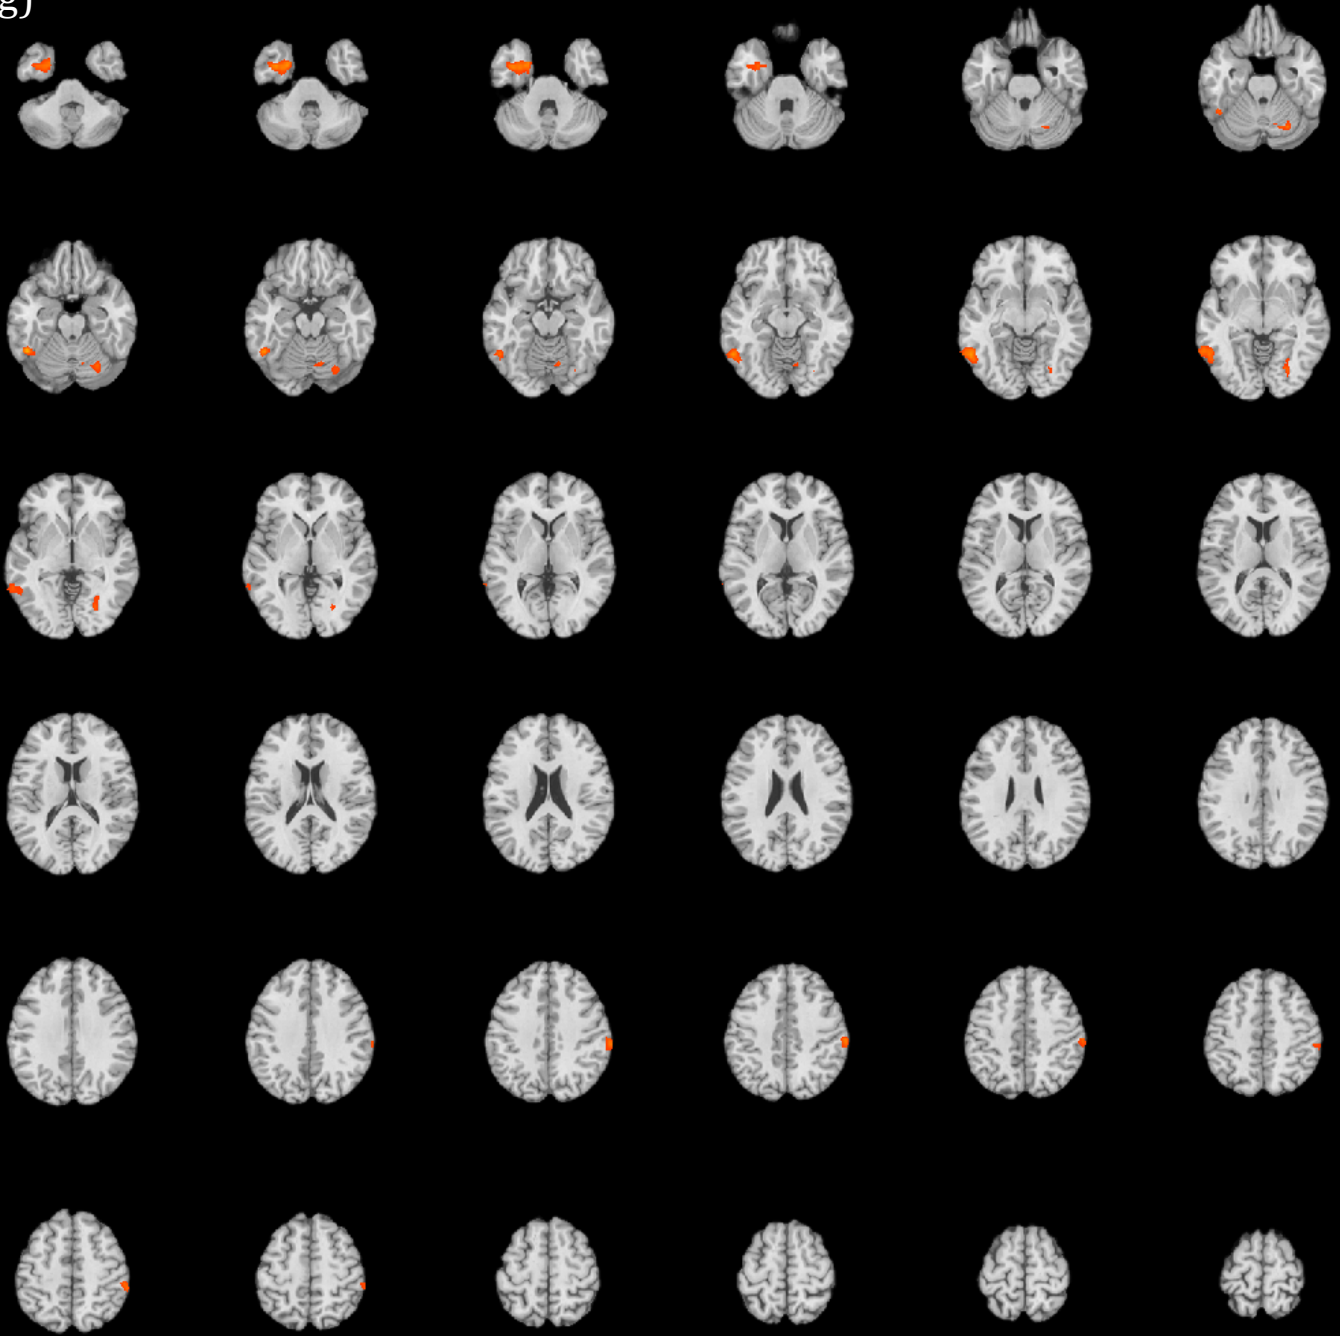

h)

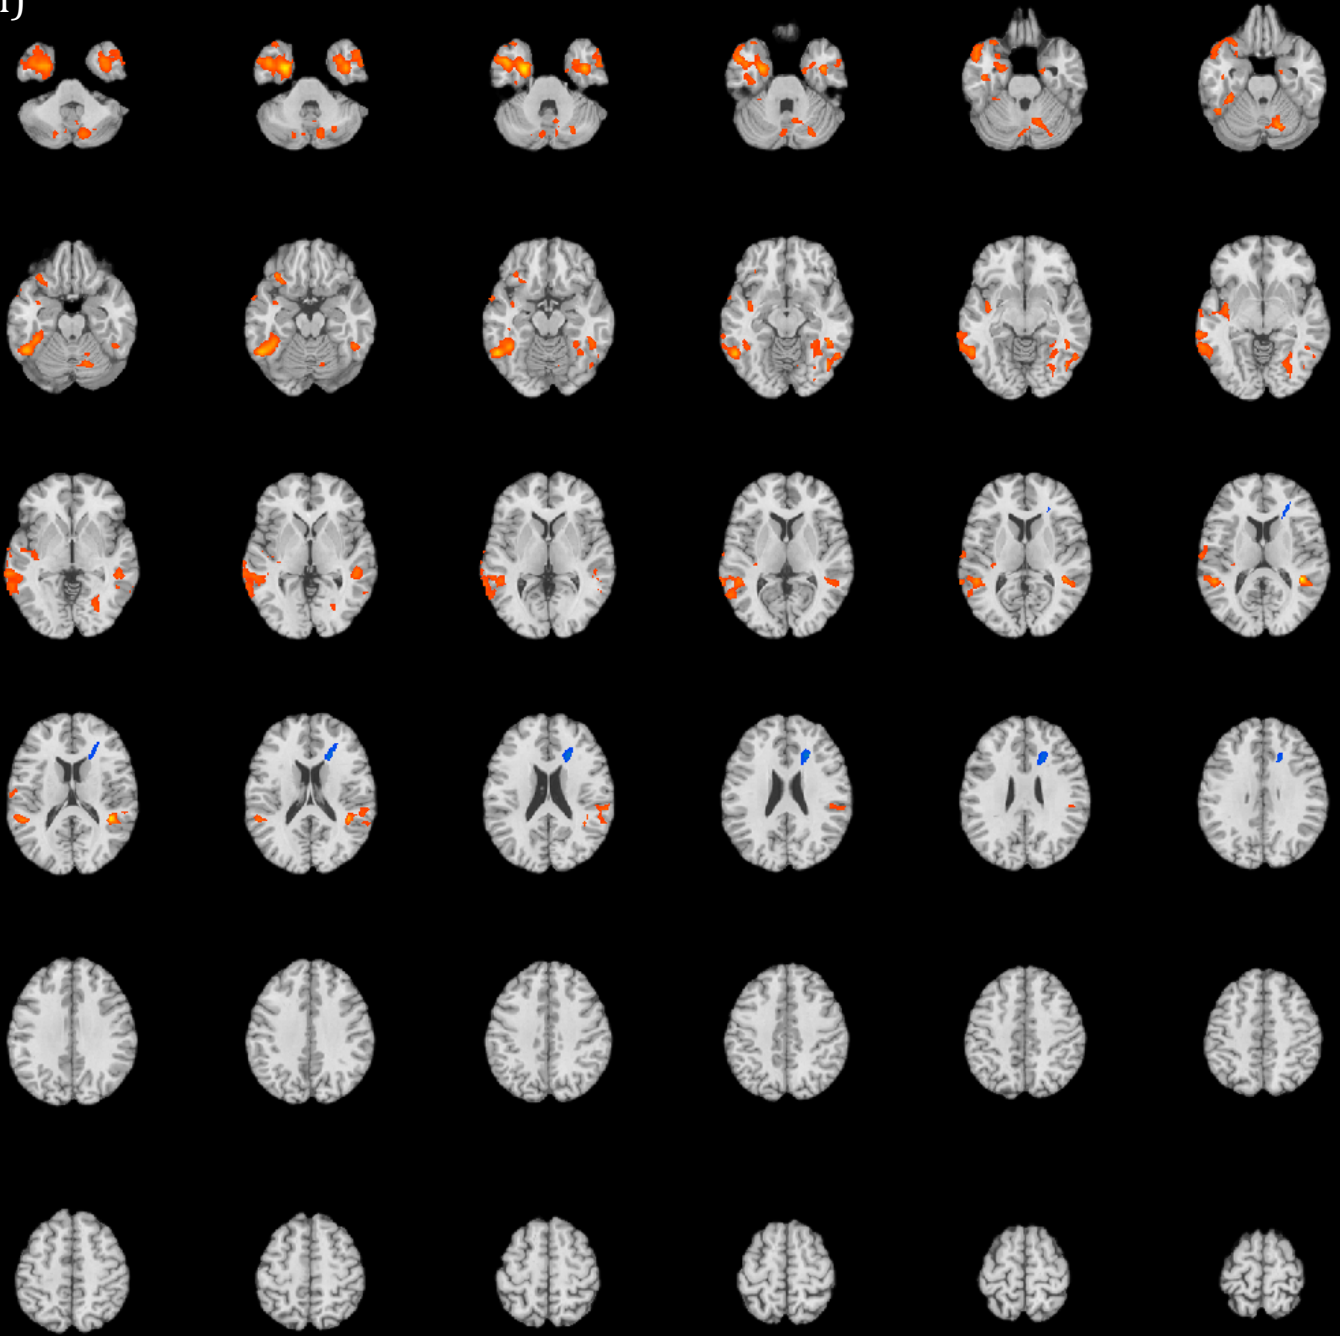

Supplement: 1112029108_sfig01.pdf [file 1112029108_sfig01.pdf]
